# Supplementary material
Source: Research Square preprint supplement (doi:10.21203/rs.3.rs-9291235/v1)
Supplement: Supplementary file 1 [file d98775556bf57d72d9361ccb.docx]

# Supplementary Materials

This supplement provides additional figures, hyperparameter settings, and cross-region performance tables that support the main manuscript.

# Appendix A. Completed time series after missing-value imputation

We apply the proposed MLP-based imputation procedure to fill missing observations for all ten DMAs. Figure S1 visualizes the repaired demand trajectories used for subsequent model training and testing.


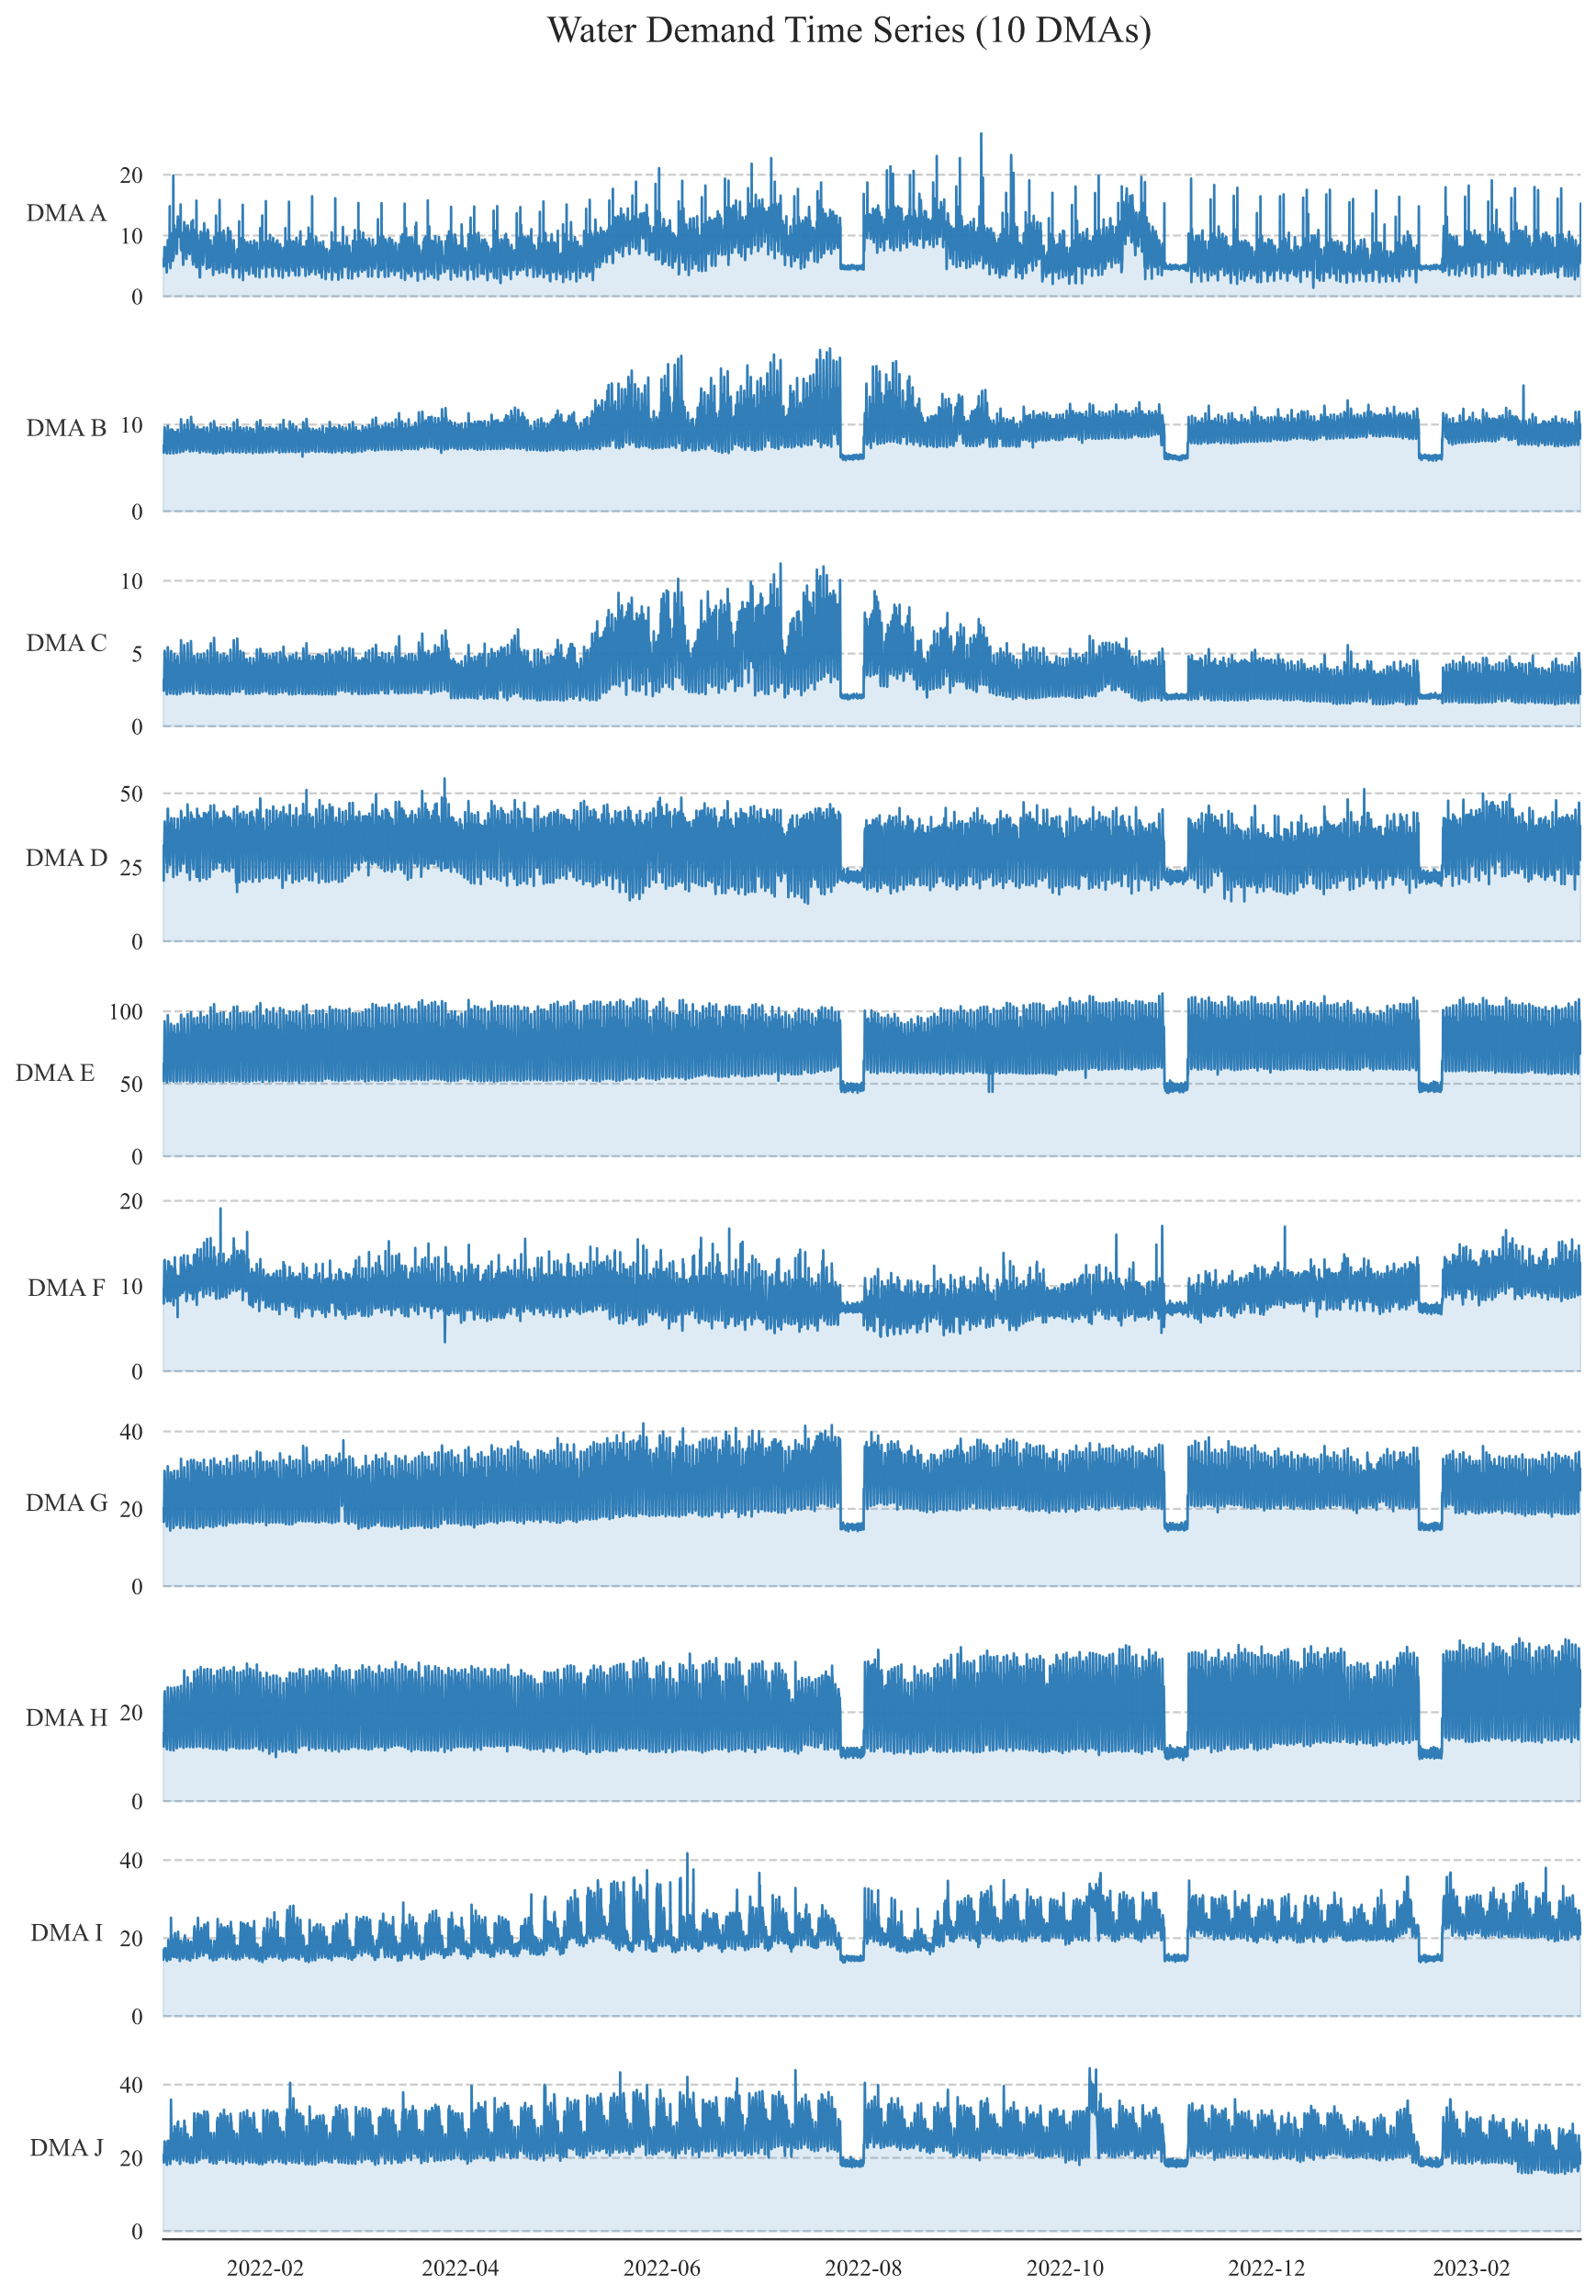


***Figure S1. Ten DMA demand time series after MLP-based missing value completion (10-minute resolution).***

The completed series show clear diurnal patterns and seasonal variability across DMAs. Importantly, the imputed segments do not introduce discontinuities or artificial spikes, which helps avoid error amplification during multi-step forecasting.

# Appendix B. Hyperparameter settings

Table S1 summarizes the hyperparameters used in the experiments, selected through random search on the validation set.

***Table S1.*** *Key hyperparameters for CAM-LSTM.*

| Hyperparameters | Search Spaces | Optimal Values |
| --- | --- | --- |
| Embedding Dimension | Integers in [64, 128, 256, 512] | 256 |
| Feed-forward Network Dimension | Integers in [128, 256, 512, 1024] | 512 |
| Number of Attention Heads | Integers in [2, 4, 8, 16] | 8 |
| Number of Layers | Integers in [1, 2, 3, 4] | 2 |
| Dropout Rate | Reals in [0.1, 0.3, 0.6] | 0.6 |
| Historical Look-back Window | Integers in [48, 96, 128, 192] | 128 |
| Learning Rate | Set in [0.001，0.0005，0.0001] | 0.0001 |

The combination of three graph convolution layers and a two-layer CNN allows the model to extract spatial dependencies and local temporal features before attention-based fusion and LSTM reasoning.

# Appendix C. Additional forecasting results in other DMAs

To complement the main text (which focuses on DMA J as a representative case study), we report full performance tables for two additional DMAs. These results confirm that CAM-LSTM provides consistent gains across heterogeneous demand regimes.

***Table S2.*** *Prediction performance on DMA A test set (1 h / 3 h / 5 h horizons).*

| Model | NSE (1 h) | NSE (3 h) | NSE (5 h) | MAPE (1 h) | MAPE (3 h) | MAPE (5 h) | RMSE (1 h) | RMSE (3 h) | RMSE (5 h) |
| --- | --- | --- | --- | --- | --- | --- | --- | --- | --- |
| CNN | 0.5658 | 0.5105 | 0.4943 | 0.1581 | 0.1609 | 0.1692 | 1.4831 | 1.5713 | 1.5970 |
| LSTM | 0.5010 | 0.4713 | 0.5010 | 0.1538 | 0.1441 | 0.1538 | 1.5865 | 1.6331 | 1.5865 |
| CNN-LSTM | 0.5478 | 0.5453 | 0.4832 | 0.1276 | 0.1410 | 0.1525 | 1.5136 | 1.5145 | 1.6145 |
| MLP-LSTM | 0.5938 | 0.4585 | 0.4134 | 0.1344 | 0.1572 | 0.1706 | 1.4346 | 1.6528 | 1.7201 |
| GNN-LSTM | 0.4975 | 0.4688 | 0.4246 | 0.1597 | 0.1755 | 0.1773 | 1.5956 | 1.6369 | 1.7035 |
| CAM-LSTM | 0.6374 | 0.5704 | 0.5384 | 0.1151 | 0.1352 | 0.1386 | 1.3554 | 1.4722 | 1.5258 |

DMA A exhibits relatively low and stable demand (Table 1 in the main text). The improvements from CAM-LSTM are particularly visible in MAPE and RMSE, indicating better tracking of small fluctuations and reducing relative error in low-flow regimes.

***Table S3.*** *Prediction performance on DMA F test set (1 h / 3 h / 5 h horizons).*

| Model | NSE (1 h) | NSE (3 h) | NSE (5 h) | MAPE (1 h) | MAPE (3 h) | MAPE (5 h) | RMSE (1 h) | RMSE (3 h) | RMSE (5 h) |
| --- | --- | --- | --- | --- | --- | --- | --- | --- | --- |
| CNN | 0.7136 | 0.6704 | 0.6389 | 0.0700 | 0.0731 | 0.0760 | 0.9314 | 0.9992 | 1.0460 |
| LSTM | 0.6713 | 0.6083 | 0.6212 | 0.0716 | 0.0794 | 0.0796 | 0.9977 | 1.0893 | 1.0713 |
| CNN-LSTM | 0.5505 | 0.4444 | 0.2778 | 0.0818 | 0.0972 | 0.1154 | 1.1667 | 1.2972 | 1.4792 |
| MLP-LSTM | 0.7044 | 0.3925 | 0.3765 | 0.0681 | 0.1030 | 0.0983 | 0.9462 | 1.3565 | 1.3745 |
| GNN-LSTM | 0.5891 | 0.3205 | 0.2210 | 0.0801 | 0.1045 | 0.1172 | 1.1156 | 1.4346 | 1.5363 |
| CAM-LSTM | 0.7371 | 0.6765 | 0.6603 | 0.0651 | 0.0720 | 0.0734 | 0.8922 | 0.9899 | 1.0145 |

DMA F contains a larger mean demand and stronger day-to-day variation. CAM-LSTM yields the best NSE at all horizons and the lowest RMSE, suggesting that the dynamic graph and attention fusion are beneficial for both moderate-demand and high-demand districts.

# Appendix D. Reproducibility and implementation details

All experiments were implemented in PyTorch. Model selection was based on validation NSE, and the reported results are computed on the held-out test set. To reduce randomness, the MLP imputation was repeated 100 times with different random initializations and the final filled value was computed as an ensemble mean.
